# Supplementary material for: Bidirectional iterative synthesis of alternating benzene–furan oligomers towards molecular wires
Source: Royal Society of Chemistry journal article supplement (doi:10.1039/b207881c), 2002-01-01
Supplement: b207881c.doc [file b207881c.doc]

**Bidirectional Iterative Synthesis of Alternating Furan and Benzene Oligomers towards Molecular Wires**

Chin-Fa Lee,a Ching-Yuan Liu,a Hua-Can Song,a,b Shr-Jie Luo,b Jui-Chang Tseng,a Hsi-Hua Tso,b and Tien-Yau Luh*a,b

aDepartment of Chemistry, National Taiwan University, Taipei, Taiwan 106

bInstitute of Chemistry, Academia Sinica, Taipei, Taiwan 115

**Supplementary Materials.**

**Experimental Procedures for the preparation of 5-10.**

**Oligomer 5.** Under argon atmosphere, a THF solution (10 mL) of **2a** (321 mg, 1.0 mmol) was treated with  nBuLi (0.42 mL of 2.5 M solution, 1.05 mmol) and stirred at -78 oC for 50 min. A THF solution (10 mL) of **4a** (164 mg, 1.0 mmol) was introduced at -78 oC. After 0.5 h, the cooling bath was removed and the mixture was gradually warmed to rt and stirred for an additional 0.5 h. Trifluoroacetic acid (0.3 mL, 3.6 mmol) was added. The mixture was stirred at rt overnight and taken up in ether (50 mL), and washed with 10% NH4Cl (50 mL), water (50 mL) and brine (50 mL). The organic layer was dried (MgSO4), the solvent was removed in vacuo. The residue was dissolved in ether (2 mL) to which pentane (2 mL) was added. The precipitate was collected and recrystallized from ethanol-CH2Cl2 to give **5** (263 mg, 67%): mp 110-111 oC; 1H NMR (400 MHz, CDCl3)  0.95 (t, *J* = 7.3 Hz, 3 H), 1.44 (sext, *J* = 7.3 Hz, 2 H), 1.67 (tt, *J* = 7.7, 7.3 Hz, 2 H), 2.73 (t, *J* = 7.7 Hz, 2 H), 3.916 (s, 3 H), 3.925 (s, 3 H), 6.80 (s, 1 H), 7.75 (d, *J* = 8.3 Hz, 2 H), 7.76 (d, *J* = 8.3 Hz, 2 H), 8.05 (d, *J* = 8.3 Hz, 2 H), 8.08 (d, *J* = 8.3 Hz, 2 H); 13C NMR (100 MHz, CDCl3)13.9, 22.6, 25.9, 31.9, 52.1, 111.7, 123.5, 125.0, 126.8, 128.2, 128.7, 130.0, 130.1, 134.3, 135.4, 148.0, 151.7, 166.76, 166.8; IR (KBr)  2963, 2935, 2870, 1717, 1609, 1437, 1284, 1103, 772, 701cm-1; HRMS calcd for C24H24O5: 392.1624, found: 392.1635; Anal. Calcd for C24H24O5: C, 73.45; H, 6.16, found: C,73.38; H, 6.63.

**Oligomer 6a.** Under argon atmosphere, a THF solution (10 mL) of **2a** (641 mg, 2.0 mmol) was treated with nBuLi (0.84 mL of 2.5 M solution, 2.1 mmol) and stirred at -78 oC for 50 min. A THF solution (10 mL) of terephthaldicarboxaldehyde (134 mg, 1.0 mmol) was introduced at -78 oC. After 0.5 h, the cooling bath was removed and the mixture was gradually warmed to rt and stirred for 0.5 h. Trifluoroacetic acid (0.3 mL, 3.6 mmol) was added. The mixture was stirred at rt overnight and taken up in ether (50 mL), and washed with 10% NH4Cl (50 mL), water (50 mL) and brine (50 mL). The organic layer was dried (MgSO4), the solvent was removed in vacuo. The residue was dissolved in ether (5 mL) to which pentane (20 mL) was added. The precipitate was collected and recrystallized from ethanol-CHCl3 to give **6a** (265 mg, 45%): mp 169-170 oC; 1H NMR (300 MHz, CDCl3)  0.97 (t, *J* = 7.4 Hz, 6 H), 1.46 (sext, *J* = 7.4 Hz, 4 H), 1.69 (quint, *J* = 7.6 Hz, 4 H), 2.74 (t, *J* = 7.6 Hz, 4 H), 3.92 (s, 6 H), 6.80 (s, 2 H), 7.76 (d, *J* = 7.7 Hz, 4 H), 7.77 (s, 4 H), 8.05 (d, *J* = 7.7 Hz, 4 H); 13C NMR (100 MHz, CDCl3) 14.0, 22.6, 25.9, 32.1, 52.1,111.7, 123.2, 125.0, 125.7, 128.3, 130.0, 130.1, 134.6, 148.8, 150.9, 166.8; IR (KBr)  2953, 2928, 2871, 2860, 1714, 1608, 1508, 1457, 1438, 1413, 1393, 1287, 1277, 1203, 1180, 1114, 1106, 1064, 1016, 994, 961, 933, 836, 771, 700, 668, 490cm-1; MS (70 eV) m/z (rel. intensity) 590 (M+,100), 207 (15), 151 (37), 121 (53), 97 (43), 83 (38), 71 (44), 57 (62); HRMS calcd for C38H38O6: 590.2668, found: 590.2661; Anal. Calcd for C38H38O6: C, 77.26; H, 6.48, found: C, 77.12; H, 6.42.

**Dialdehyde 8a.** Under argon atmosphere, a THF solution (20 mL) of **6a** (590 mg, 1.0 mmol) was treated with DIBAH (4.0 mL of 1.0 M solution, 4.0 mmol) at 0 oC stirred for 30 min, the mixture was gradually warmed to rt and stirred for 5 h and quenched with 10% NH4Cl (10 mL). The separated organic layer was dried (MgSO4), the solvent was removed in vacuo. The residue was recrystallized from ethanol-CHCl3 to give the corresponding diol **7a** (265 mg, 95%): mp 170-171 oC; 1H NMR (300 MHz, CDCl3)  0.97 (t, *J* = 7.3 Hz, 6 H), 1.46 (sext, *J* = 7.3 Hz, 4 H), 1.68 (s,2 H), 1.69 (tt, *J* = 7.6, 7.3 Hz, 4 H), 2.73 (t, *J* = 7.6 Hz, 4 H), 4.70 (s, 4 H), 6.67 (s, 2 H), 7.38 (d, *J* = 8.2 Hz, 4 H), 7.71 (d, *J* = 8.2 Hz, 4 H), 7.75 (s, 4 H); 13C NMR (100 MHz, CDCl3) 14.0, 22.7, 25.9, 32.1, 65.2, 109.5, 123.9, 124.5, 125.5, 127.4, 130.0, 130.2, 139.8, 147.8, 151.7; IR (KBr)  3339, 3264, 3118, 2957, 2928, 2857, 1617, 1740, 1510, 1490, 1467, 1437, 1412, 1284, 1186, 1045, 1016, 994, 936, 830, 786, 712, 673, 498cm-1; HRMS calcd for C36H38O4: 534.2770, found: 534.2757; Anal. Calcd for C36H38O4: C, 80.87; H, 7.16, found: C, 80.52; H, 7.08.

Under argon atmosphere, a CH2Cl2 solution (20 mL) of the diol(534 mg, 1.0 mmol) was treated with activated MnO2 (348 mg, 4.0 mmol) at rt and stirred for 20 min. The reaction mixture was filtered via a short silica-gel column, the solvent was removed in vacuo to give **8a** (438 mg, 82%):mp 189-190 oC; 1H NMR (400 MHz, CDCl3)  0.99 (t, *J* = 7.4 Hz, 6 H), 1.48 (sext, *J* = 7.4 Hz, 4 H), 1.72 (tt, *J* = 7.7, 7.4 Hz, 4 H), 2.77 (t, *J* = 7.7 Hz, 4 H), 6.88 (s, 2 H), 7.80 (s, 4 H), 7.87 (d, *J* = 8.6 Hz, 4 H), 7.91 (d, *J* = 8.6 Hz, 4 H), 9.99 (s, 2 H); 13C NMR (100 MHz, CDCl3) 14.0, 22.6, 25.9, 32.0, 112.6, 123.7, 125.3, 125.8, 130.0, 130.4, 134.8, 135.9, 149.3, 150.6, 191.4; IR (KBr)  2957, 2932, 2861, 2739, 1695, 1604, 1572, 1563, 1506, 1483, 1468, 1427, 1392, 1304, 1213, 1191, 1163, 1104, 1094, 1056, 935, 832, 818, 791, 670, 498cm-1;MS (70 eV) m/z (rel. intensity) 530 (M+, 67), 368 (27), 213 (15), 185 (17), 171 (12), 129 (23), 115 (19), 87 (23), 73 (53), 55 (100); HRMS calcd for C36H34O4: 530.2457, found: 530.2452.

**Oligomer 6b.** Under argon atmosphere, a THF solution (40 mL) of **2a** (770 mg, 2.4 mmol) was treated with  nBuLi (1.00 mL of 2.5 M solution, 2.52 mmol) and stirred at -78 oC for 50 min. A THF solution (40 mL) of **8a** (531 mg, 1.0 mmol) was then introduced at -78 oC. After 0.5 h, the cooling bath was removed and the mixture was gradually warmed to rt and stirred for 0.5 h. Trifluoroacetic acid (0.4 mL, 4.8 mmol) was added. The mixture was stirred at rt overnight and taken up in ether (50 mL), and washed with 10% NH4Cl (50 mL), water (50 mL) and brine (50 mL). The organic layer was dried (MgSO4), the solvent was removed in vacuo. The residue was dissolved in ether (10 mL). The precipitate was collected and recrystallized from ethanol-CHCl3 to give **6b** as a golden solid (375 mg, 38%): mp 209-211 oC; 1H NMR (400 MHz, CDCl3)  0.99 (t, *J* = 7.2 Hz, 6 H), 1.00 (t, *J* = 7.2 Hz, 6 H), 1.40-1.60 (m,8 H), 1.60-1.80 (m, 8 H), 2.72-2.80 (m,8 H), 3.93 (s, 6 H), 6.73 (s, 2 H), 6.81 (s, 2 H), 7.73-7.82 (m, 16 H), 8.10 (d, *J* = 8.8 Hz, 4 H); 13C NMR (100 MHz, CDCl3) 14.16, 14.21, 22.84, 22.90, 26.1, 26.2, 32.27, 32.34, 52.3, 110.1, 111.9, 123.5, 124.1, 124.97, 125.00, 125.8, 126.0, 128.5, 129.6, 130.2, 130.3, 130.4 134.9, 148.2, 149.2, 151.1, 151.9, 167.1; IR (KBr)  2957, 2932, 2862, 1721, 1610, 1508, 1436, 1279, 1176, 1108, 934, 836 771, 698cm-1 ; MS (70 eV): m/z: 986; Anal. Calcd for C66H66O8: C, 80.30; H, 6.74, found: C, 79.86; H, 6.82.

**Dialdehyde 8b.** Under argon atmosphere, a THF solution (50 mL) of **6b** (987 mg, 1.0 mmol) was treated with DIBAH (4.0 mL of 1.0 M solution, 4.0 mmol ) at 0 oC stirred for 30 min, the mixture was gradually warmed to rt and stirred for 5 h and quenched with saturated aqueous NH4Cl (10 mL). The separated organic layer was dried (MgSO4) and the solvent was removed in vacuo. Under argon atmosphere, the residue (crude **7b**) was dissolved in CH2Cl2 (50 mL) and treated with activated MnO2 (348 mg, 4.0 mmol) and stirred for 1 h. The reaction mixture was filtered via a short silica-gel column, the solvent was removed in vacuo. The residue was recrystallized from ethanol-CHCl3 to give **8b** (723 mg, 78%): mp 220-222 oC; 1H NMR (400 MHz, CDCl3)  0.97 (t, *J* = 7.4 Hz, 6 H), 0.99 (t, *J* = 7.4 Hz, 6 H), 1.47 (quint, *J* = 7.8 Hz, 8 H), 1.71 (sext, *J* = 7.4 Hz, 8 H), 2.74 (t, *J* = 7.8 Hz, 4 H), 2.76 (t, *J* = 7.8 Hz, 4 H), 6.73 (s, 2 H), 6.86 (s, 2 H), 7.74 (d, *J* = 8.6 Hz, 4 H), 7.78 (s, 4 H), 7.80 (d, *J* = 8.6 Hz, 4 H), 7.85 (d, *J* = 8.4 Hz, 4 H), 7.90 (d, *J* = 8.4 Hz, 4 H), 9.97 (s, 2 H); 13C NMR (100 MHz, CDCl3) 13.98, 14.04, 22.6, 22.7, 25.9, 26.0, 32.0, 32.1, 110.0, 112.7, 123.7, 123.9, 124.8, 125.0, 125.5, 125.9, 129.5, 129.8, 129.9, 130.4, 134.6, 136.0, 148.0, 149.5, 150.5, 151.6, 191.5; IR (KBr)  2953, 2930, 2859, 2736, 1697, 1605, 1507, 1483, 1213, 1164, 934, 829, 669cm-1; MS (70 eV): m/z: 926; Anal. Calcd for C64H62O6: C, 82.91; H, 6.74, found: C, 82.93; H, 6.73.

**Oligomer 6c.** Under argon atmosphere, a THF solution (40 mL) of **2a** (770 mg, 2.4 mmol) was treated with nBuLi (1.00 mL of 2.5 M solution, 2.52 mmol) and stirred at -78 oC for 50 min. A THF solution (40 mL) of **8b** (927 mg, 1.0 mmol) was then introduced at -78 oC. After 0.5 h, the cooling bath was removed and the mixture was gradually warmed to rt and stirred for 0.5 h. Trifluoroacetic acid (0.4 mL, 4.8 mmol) was added. The mixture was stirred at rt overnight and taken up in ether (50 mL), and washed with 10% NH4Cl (50 mL), water (50 mL) and brine (50 mL). The organic layer was dried (MgSO4), the solvent was removed in vacuo. The residue was dissolved in ether (10 mL). The precipitate was collected and recrystallized from ethanol-CHCl3 to give **6c** as a golden solid (440 mg, 32%): mp 221-222 oC; 1H NMR (400 MHz, CDCl3)  0.97 (t, *J* = 7.3 Hz, 6 H), 0.98 (t, *J* = 7.3 Hz, 6 H), 0.99 (t, *J* = 7.3 Hz, 6 H), 1.25-1.55 (m, 12 H), 1.55-1.80 (m,12 H), 2.70-2.80 (m, 12 H), 3.91 (s, 6 H), 6.716 (s, 2 H), 6.72 (s, 2 H), 6.80 (s, 2 H), 7.60-7.90 (m,24 H), 8.05 (brd, *J* = 8.4 Hz, 4 H); 13C NMR (100 MHz, CDCl3) 13.98, 14.00, 14.03, 22.6, 22.7, 25.9, 26.0, 32.0, 32.08, 32.12, 52.1, 109.7, 109.9, 111.7, 123.2, 123.8, 124.7, 124.8, 125.5, 125.6, 125.8, 128.2, 129.0, 129.3, 129.9, 130.0, 130.1, 130.3, 134.6, 147.9, 148.0, 149.0, 150.8, 151.6, 151.8, 166.9 ; IR (KBr)  2956, 2929, 2859, 1721, 1687, 1610, 1562, 1510, 1461, 1276, 1177, 1107, 934, 839, 767, 675 cm-1 ; FAB calcd for C94H94O10: 1382.6847, found: 1382.6846; Anal. Calcd for C94H94O10: C, 81.59; H, 6.85, found: C, 81.84; H, 6.64.

**Diimine 9a.** To a solution of **8a** (531 mg, 1.0 mmol) and freshly distilled aniline (531 mL, 3.0 mmol) in benzene (20 mL) and THF (20 mL) were added 3 Å molecular sieves (15 g) that had been activated in oven. After being stirred at rt for 6 h. The reaction mixture was filtered via a short silica-gel column, the solvent was removed in vacuo. The residue was recrystallized from pentane-CH2Cl2 to give **9a** (633 mg, 93%): mp 214-216 oC; 1H NMR (400 MHz, CDCl3)  0.98 (t, *J* = 7.4 Hz, 6 H), 1.48 (sext, *J* = 7.4 Hz, 4 H), 1.72 (tt, *J* = 7.7, 7.4 Hz, 4 H), 2.76 (t, *J* = 7.7 Hz, 4 H), 6.80 (s, 2 H), 7.15-7.30 (m, 6 H), 7.39 (t, 7.8 Hz, 4 H), 7.80 (s, 4 H), 7.82 (d, *J* = 8.4 Hz, 4 H), 7.92 (d, *J* = 8.4 Hz, 4 H), 8.45 (s, 2 H); 13C NMR (100 MHz, CDCl3) 14.0, 22.7, 25.9, 32.1, 111.2, 120.9, 123.8, 125.0, 125.6, 125.9, 129.2, 129.3, 130.0, 133.2, 134.9, 148.6, 151.3, 152.2, 159.8; IR (KBr)  2957, 2930, 2862, 1615, 1588, 1507, 1486, 1452, 1303, 1189, 1169, 1105, 932, 834, 761, 699, 539cm-1; FAB calcd for C48H44N2O2: 680.3403, found: 680.3401.

**Bispyrrole 13.** Under argon atmosphere, a THF solution (15 mL) of **2d** (262 mg, 1.0 mmol) was treated with nBuLi (0.48 mL of 2.5 M solution, 1.2 mmol) and stirred at -78 oC for 50 min. A THF solution (20 mL) of **9a** (253 mg, 0.42 mmol) was introduced at -78 oC. After 1.0 h, the cooling bath was removed and the mixture was gradually warmed to rt and stirred for 0.5 h. BF3·Et2O (0.3 mL, 2.0 mmol) was added. The mixture was stirred at rt overnight and taken up in ether (50 mL), and washed with 10% NH4Cl (50 mL), water (50 mL) and brine (50 mL). The organic layer was dried (MgSO4), the solvent was removed in vacuo. The residue was recrystallized from CHCl3 to give **13** as a golden solid (200 mg, 47%): mp 278-280 oC; 1H NMR (400 MHz, CDCl3)  0.90 (t, *J* = 7.3 Hz, 6 H), 0.95 (t, *J* = 7.3 Hz, 6 H), 1.30-1.50 (m,8 H), 1.55-1.75 (m, 8 H), 2.54 (t, *J* = 7.8 Hz, 4 H), 2.70 (t, *J* = 7.7 Hz, 4 H), 6.41 (s, 2 H), 6.61 (s, 2 H), 6.85-7.00 (m, 4 H), 7.00-7.20 (m,20 H), 7.56 (d, *J* = 8.4 Hz, 4 H), 7.70 (s, 4 H); 13C NMR (100 MHz, CDCl3) 14.0, 14.1, 22.6, 22.8, 25.9, 26.1, 32.1, 33.6, 109.5, 110.5, 122.9, 123.9, 124.5, 125.4, 126.0, 126.7, 127.9, 128.45, 128.5, 128.8 129.9, 131.0, 131.7, 132.0, 133.3, 134.1, 139.1, 147.7, 151.8 ; IR (KBr) 3067, 2956, 2929, 2860, 1687, 1600, 1500, 1465, 1380, 1070, 844, 759, 697 cm-1 ; FAB calcd for C74H72N2O2: 1020.5594, found: 1020.5689.

**Oligoaryl** **10a**. Under argon atmosphere, a THF solution (80 mL) of propargylic dithioacetal **2c** (2.15 g, 6.00 mmol)was treated with n-BuLi (2.64 mL of 2.5 M solution, 6.60 mmol) and stirred at -78 oC for 50 min. A THF solution (20 mL) of terephthaldicarboxaldehyde (400 mg, 3.00 mmol) was then introduced at -78 oC. After 1 h, the cooling bath was removed and the mixture was gradually warmed to room temperature and stirredfor 0.5 h. Trifluoroacetic acid (0.92 mL, 12 mmol) was added. The mixture was stirred at room temperature overnight and taken up in ether (20 mL), and washed with 10% NH4Cl (20 mL), water (20 mL) and brine (20 mL). The organic layer was dried (MgSO4), the solvent was removed in vacuo. The residue was dissolved in ether (10 mL) to which pentane (30 mL) was added. The precipitate was collected and recrystallized from Ether/CH2Cl2 to give **10a** (860 mg, 43%): mp 230-231 oC; 1H NMR (400 MHz, CDCl3)  0.25 (s, 18 H), 0.96 (t, *J* = 7.4 Hz, 6 H), 1.45 (sext, *J* = 7.4 Hz, 4 H), 1.67 (tt, *J* = 7.4, 7.2 Hz, 4 H), 2.72 (t, *J* = 7.2 Hz, 4 H), 6.69 (s, 2 H), 7.47 (d, *J* = 8.4 Hz, 4 H), 7.64 (d, *J* = 8.4 Hz, 4 H), 7.74 (s, 4 H); 13C NMR (100 MHz, CDCl3)  –0.01, 13.9, 22.6, 25.8, 32.0, 95.0, 105.2, 110.4, 121.5, 123.2, 124.7, 125.5, 129.9, 130.5, 132.3, 148.1, 151.2; IR (KBr)  2961, 2934, 2869, 2156, 1669, 1606, 1505, 1463, 1410, 1251, 1227, 1181, 1104, 933, 864, 842, 760, 664 cm-1; MS (EI, 70 eV) m/z (rel. intensity) 666 (M+, 96), 594 (20), 470 (6), 399 (8), 369 (12), 368 (24), 326 (16), 318 (22), 256 (12), 236 (18), 201 (33), 185 (16), 135 (12), 129 (28), 97 (48), 83 (56), 69 (68), 57 (100); HRMS calcd for C44H50O2Si2: 666.3349, found: 666.3322; Anal. Calcd for C44H50O2Si2: C, 79.23; H, 7.56, found: C, 78.70; H, 7.93.

**Oligoaryl** **11a**. The TMS-protected compound **10a** (300 mg, 0.45 mmol) was dissolved in 3 mL of THF and the resulting solution was diluted with 10 mL MeOH. A few drops of H2O were added to the solution, which was then cooled to 0 oC. Potassium carbonate (156 mg, 1.13 mmol) was added. The reaction mixture was stirred for 30 min at 0 oC, and then for 5 h at room temperature (TLC monitoring). The reaction mixture was then poured into a separating funnel containing 10 mL of Et2O and 10 mL of iced H2O. The organic layer was washed with iced H2O (4×10 mL) and brine (1×10 mL), dried with MgSO4, and filtered. The solution was concentrated under vacuum and used directly in the next step. The product **11a** was a brown solid (200 mg, 85%): mp 143-144 oC; 1H NMR (400 MHz, CDCl3)  0.97 (t, *J* = 7.3 Hz, 6 H), 1.45 (sext, *J* = 7.3 Hz, 4 H), 1.67 (tt, *J* = 7.3, 7.5 Hz, 4 H), 2.72 (t, *J* = 7.5 Hz, 4 H), 3.12 (s, 2 H), 6.70 (s, 2 H), 7.50 (d, *J* = 8.4 Hz, 4 H), 7.66 (d, *J* = 8.4 Hz, 4 H), 7.74 (s, 4 H); 13C NMR (100 MHz, CDCl3)  13.9, 22.6, 25.8, 32.0, 77.8, 83.7, 110.5, 120.4, 123.3, 124.7, 125.5, 129.9, 130.9, 132.5, 148.2, 151.1; IR (KBr)  3259, 3084, 3045, 2960, 2932, 2868, 2106, 1655, 1610, 1543, 1505, 1462, 1386, 1313, 1270, 1217, 1178, 1104, 1052, 966, 932, 838, 757, 655, 611 cm-1; MS (EI, 70 eV) m/z (rel. intensity) 522 (M+, 100), 369 (10), 368 (26), 353 (8), 313 (6), 261 (14), 236 (18), 213 (14), 185 (15), 135 (12), 129 (50), 111 (28), 97 (52), 83 (61), 69 (76), 57 (99); HRMS calcd for C38H34O2: 522.2559, found: 522.2547; Anal. Calcd for C38H34O2: C, 87.32; H, 6.56, found: C, 87.44; H, 6.92.

**Oligoaryl** **12a.** Under argon atmosphere, a THF solution (50 mL) of propargylic dithioacetal **2b** (2.70 g, 9.40 mmol)was treated with n-BuLi (4.20 mL of 2.5 M solution, 10.3 mmol) and stirred at -78 oC for 50 min. A THF solution (15 mL) of terephthaldicarboxaldehyde (0.63 g, 4.70 mmol) was then introduced at -78 oC. After 1 h, the cooling bath was removed and the mixture was gradually warmed to room temperature and stirredfor 0.5 h. Trifluoroacetic acid (1.45 mL, 18.8 mmol) was added. The mixture was stirred at room temperature overnight and taken up in ether (30 mL), and washed with 10% NH4Cl (30 mL), water (30 mL) and brine (30 mL). The organic layer was dried (MgSO4), the solvent was removed in vacuo. The residue was dissolved in ether (10 mL) to which pentane (30 mL) was added. The precipitate was collected and recrystallized from Ether/CH2Cl2 to give **12a** (1.19 g, 48%): mp 158-159 oC; 1H NMR (400 MHz, CDCl3)  0.97 (t, *J* = 7.4 Hz, 6 H), 1.47 (sext, *J* = 7.4 Hz, 4 H), 1.68 (tt, *J* = 7.4, 7.8 Hz, 4 H), 2.73 (t, *J* = 7.8 Hz, 4 H), 5.24 (d, *J* = 11.0 Hz, 2 H), 5.76 (d, *J* = 17.6 Hz, 2 H), 6.67 (s, 2 H), 6.71 (dd, *J* = 17.6, 11.0 Hz, 2 H), 7.42 (d, *J* = 8.2 Hz, 4 H), 7.67 (d, *J* = 8.2 Hz, 4 H), 7.75 (s, 4 H); 13C NMR (100 MHz, CDCl3)  14.0, 22.6, 25.9, 32.0, 109.6, 113.6, 123.7, 124.6, 125.4, 126.5, 129.9, 130.1, 136.3, 136.4, 147.7, 151.7.

**Oligoaryl** **14**. A slurry of potassium carbonate (190 mg, 1.37 mmol), palladium acetate (11.5 mg, 0.05 mmol), and triphenylphosphine (40.4 mg, 0.15 mmol) in acetonitrile (30 mL) was degassed using argon for 10 min and then warmed till the solution became dark red. To this degassed solution was added compound **12a** (180 mg, 0.34 mmol) and **4b** (252 mg, 1.36 mmol). The reaction mixture was heated at reflux temperature under argon atmosphere for 48 h. After cooling, the reaction mixture was filtered, the solid was washed with chloroform and the combined filtrates were concentrated in vacuo and then recrystallized from a mixture of ether and pentane (ratio = 1/4) to give **14** (180 mg, 72%): mp 213-214 oC; 1H NMR (400 MHz, CD2Cl2)  1.00 (t, *J* = 7.3 Hz, 6 H), 1.49 (sext, *J* = 7.3 Hz, 4 H), 1.73 (tt, *J* = 7.3, 7.7 Hz, 4 H), 2.77 (t, *J* = 7.7 Hz, 4 H), 6.79 (s, 2 H), 7.21 (d, *J* = 16.4 Hz, 2 H), 7.31 (d, *J* = 16.4 Hz, 2 H), 7.62 (d, *J* = 8.2 Hz, 4 H), 7.70 (d, *J* = 8.2 Hz, 4 H), 7.77 (d, *J* = 8.2 Hz, 4 H), 7.81 (s, 4 H), 7.87 (d, *J* = 8.2 Hz, 4 H), 9.98 (s, 2 H); 13C NMR (100 MHz, CD2Cl2)  14.2, 23.1, 26.4, 32.5, 110.8, 124.4, 125.6, 125.9, 127.3, 127.5, 127.8, 130.4, 130.6, 131.0, 132.0, 135.9, 136.0, 143.8, 148.4, 152.0, 191.9; IR (KBr)  3027, 2960, 2933, 2869, 2732, 1695, 1598, 1566, 1507, 1420, 1308, 1265, 1216, 1169, 1107, 1075, 1052, 1012, 968, 838, 771 cm-1; MS (FAB) m/z (rel. intensity) 734 (M+, 80), 706 (15), 433 (25), 345 (10), 307 (60), 289 (40), 259 (20), 235 (100), 207 (20); HRFAB calcd for C52H46O4: 734.3396, found: 734.3403.

**Oligoaryl** **15.** A solution of PdCl2(PPh3)2 (32.2 mg, 0.05 mmol), CuI (17.5 mg, 0.09 mmol), and triphenylphosphine (24.1 mg, 0.09 mmol) in dry acetonitrile (10 mL) and anhydrous triethylamine (20 mL) was degassed using argon for 10 min and then warmed till the solution became dark red. To this degassed solution was added compound **11a** (240 mg, 0.46 mmol) and **4b** (298 mg, 1.61 mmol). The reaction mixture was heated at reflux temperature (100 oC) under argon atmosphere for 48 h. After cooling, the reaction mixture was filtered, the solid was washed with chloroform and the combined filtrates were concentrated in vacuo and then recrystallized from a warmed hexane solution to give **15** (262mg, 78%): mp 182-183 oC; 1H NMR (400 MHz, CDCl3)  0.97 (t, *J* = 7.3 Hz, 6 H), 1.47 (sext, *J* = 7.3 Hz, 4 H), 1.70 (tt, *J* = 7.3, 7.5 Hz, 4 H), 2.74 (t, *J* = 7.5 Hz, 4 H), 6.74 (s, 2 H), 7.56 (d, *J* = 8.2 Hz, 4 H), 7.67 (d, *J* = 8.2 Hz, 4 H), 7.72 (d, *J* = 8.2 Hz, 4 H), 7.76 (s, 4 H), 7.86 (d, *J* = 8.2 Hz, 4 H), 10.0 (s, 2 H); 13C NMR (100 MHz, CDCl3)  13.9, 22.6, 25.9, 32.0, 89.4, 93.7, 110.8, 120.8, 123.5, 124.9, 125.5, 128.5, 129.6, 129.9, 130.9, 131.9, 132.0, 132.2, 135.3, 148.3, 151.1, 191.4; IR (KBr)  3045, 2958, 2934, 2867, 2737, 2680, 2494, 2212, 1700, 1599, 1562, 1509, 1467, 1393, 1304, 1207, 1170, 1135, 1104, 1009, 960, 932, 835, 752, 722, 674 cm-1; MS (FAB) m/z (rel. intensity) 730 (M+, 75), 460 (10), 431 (15), 367 (10), 307 (100), 279 (50), 233 (30); HRFAB calcd for C52H42O4: 730.3083, found: 730.3038.

**Oligoaryl** **16.** Under argon atmosphere, a THF solution (50 mL) of propargylic dithioacetal **2b** (142 mg, 0.49 mmol)was treated with n-BuLi (0.24 mL of 2.5 M solution, 0.59 mmol) and stirred at -78 oC for 50 min. A THF solution (35 mL) of compound **14** (180 mg, 0.25 mmol) was then introduced at -78 oC. After 1 h, the cooling bath was removed and the mixture was gradually warmed to room temperature and stirredfor 0.5 h. Trifluoroacetic acid (0.08 mL, 0.98 mmol) was added. The mixture was stirred at room temperature overnight and taken up in ether (20 mL), and washed with 10% NH4Cl (20 mL), water (20 mL) and brine (20 mL). The organic layer was dried (MgSO4), the solvent was removed in vacuo. The residue was dissolved in ether (10 mL) to which pentane (30 mL) was added. The precipitate was collected and recrystallized from Ether/CH2Cl2 to give **16** (175 mg, 62%): mp 173-174 oC; 1H NMR (500 MHz, CD2Cl2)  0.99 (t, *J* = 7.8 Hz, 6 H), 1.01 (t, *J* = 7.7 Hz, 6 H), 1.35-1.55 (m, 8 H), 1.60-1.80 (m, 8 H), 2.60-2.90 (m, 8 H), 5.27 (d, *J* = 11.0 Hz, 2 H), 5.80 (d, *J* = 17.6 Hz, 2 H), 6.74 (s, 2 H), 6.75 (dd, *J* = 17.6, 11.0 Hz, 2 H), 6.77 (s, 2 H), 7.21 (s, 4 H), 7.47 (d, *J* = 8.2 Hz, 4 H), 7.61 (d, *J* = 8.2 Hz, 4 H), 7.63 (d, *J* = 8.2 Hz, 4 H), 7.71 (d, *J* = 8.2 Hz, 4 H), 7.74 (d, *J* = 8.2 Hz, 4 H), 7.77 (d, *J* = 8.2 Hz, 4 H), 7.82 (s, 4 H); 13C NMR (125 MHz, CD2Cl2)  14.3, 23.21, 23.25, 26.4, 26.5, 32.5, 32.6, 110.3, 110.4, 114.0, 124.2, 124.3, 125.4, 125.5, 125.8, 125.9, 127.1, 127.2, 127.4, 128.42, 128.49, 130.3, 130.4, 130.5, 136.2, 136.7, 136.9, 137.0, 148.2, 148.3, 152.1, 152.2; IR (KBr)  3086, 3031, 2959, 2932, 2868, 1906, 1660, 1604, 1510, 1462, 1416, 1270, 1219, 1180, 1107, 1054, 963, 935, 906, 838, 757, 673 cm-1; MS (FAB) m/z (rel. intensity) 1126 (M+, 48), 902 (17), 460 (15), 391 (10), 307 (100), 289 (50); HRFAB calcd for C82H78O4: 1126.5900, found: 1126.5913.

**Oligoaryl 17.** Under argon atmosphere, a THF solution (50 mL) of propargylic dithioacetal **2c** (295 mg, 0.82 mmol)was treated with n-BuLi (0.34 mL of 2.5 M solution, 0.85 mmol) and stirred at -78 oC for 50 min. A THF solution (25 mL) of compound **15** (200 mg, 0.27 mmol) was then introduced at -78 oC. After 1 h, the cooling bath was removed and the mixture was gradually warmed to room temperature and stirredfor 0.5 h. Trifluoroacetic acid (0.13 mL, 1.64 mmol) was added. The mixture was stirred at room temperature overnight and taken up in ether (10 mL), and washed with 10% NH4Cl (10 mL), water (10 mL) and brine (10 mL). The organic layer was dried (MgSO4), the solvent was removed in vacuo. The residue was dissolved in ether (5 mL) to which pentane (15 mL) was added. The precipitate was collected and recrystallized from Ether/CH2Cl2 to give **17** (153 mg, 45%): mp 191-192 oC; 1H NMR (400 MHz, CDCl3)  0.24 (s, 18 H), 0.96 (t, *J* = 7.4 Hz, 6 H), 0.98 (t, *J* = 7.3 Hz, 6 H), 1.30-1.50 (m, 8 H), 1.55-1.80 (m, 8 H), 2.50-2.80 (m, 8 H), 6.69 (s, 2 H), 6.72 (s, 2 H), 7.47 (d, *J* = 8.5 Hz, 4 H), 7.56 (d, *J* = 8.5 Hz, 4 H), 7.58 (d, *J* = 8.5 Hz, 4 H), 7.64 (d, *J* = 8.5 Hz, 4 H), 7.67 (d, *J* = 8.5 Hz, 4 H), 7.71 (d, *J* = 8.5 Hz, 4 H), 7.77 (s, 4 H); 13C NMR (100 MHz, CDCl3)  0.28, 14.25, 14.29, 22.90, 22.95, 26.2, 32.2, 32.3, 75.3, 82.7, 90.82, 90.86, 95.4, 105.4, 110.7, 110.8, 111.3, 120.3, 122.0, 123.6, 123.7, 125.1, 125.4, 125.8, 130.0, 130.3, 130.64, 130.69, 131.4, 131.5, 132.1, 132.2, 132.6, 133.2, 148.1, 148.4, 148.8, 151.3, 151.6, 151.8; IR (KBr)  3043, 2960, 2933, 2869, 2213, 2156, 1687, 1605, 1556, 1510, 1414, 1313, 1289, 1251, 1218, 1179, 1138, 1105, 1053, 1012, 932, 863, 840, 758, 671 cm-1; MS (FAB) m/z (rel. intensity) 1263 [(M+H)+, 35], 1262 (M+, 30), 998 (10), 697 (5), 629 (5), 565 (5), 549 (13), 499 (6), 471 (8), 417 (6), 331 (23), 299 (35), 289 (15), 267 (10), 201 (100); HRFAB calcd for C88H86O4Si2: 1262.6065, found: 1262.6051.

**Oligoaryl 18.** Under argon atmosphere, a THF solution (50 mL) of propargylic dithioacetal **2b** (180 mg, 0.63 mmol)was treated with n-BuLi (0.28 mL of 2.5 M solution, 0.69 mmol) and stirred at -78 oC for 50 min. A THF solution (25 mL) of compound **15** (182 mg, 0.25 mmol) was then introduced at -78 oC. After 1 h, the cooling bath was removed and the mixture was gradually warmed to room temperature and stirredfor 0.5 h. Trifluoroacetic acid (0.10 mL, 1.25 mmol) was added. The mixture was stirred at room temperature overnight and taken up in ether (10 mL), and washed with 10% NH4Cl (10 mL), water (10 mL) and brine (10 mL). The organic layer was dried (MgSO4), the solvent was removed in vacuo. The residue was dissolved in ether (5 mL) to which pentane (15 mL) was added. The precipitate was collected and recrystallized from Ether/CH2Cl2 to give **18** (135 mg, 48%): mp 163-164 oC; 1H NMR (400 MHz, CDCl3)  0.96 (t, *J* = 7.3 Hz, 6 H), 0.98 (t, *J* = 7.2 Hz, 6 H), 1.30-1.50 (m, 8 H), 1.55-1.80 (m, 8 H), 2.50-3.00 (m, 8 H), 5.25 (d, *J* = 11.0 Hz, 2 H), 5.76 (d, *J* = 17.6 Hz, 2 H), 6.60-6.75 (m, 6 H, two singlets showed at δ 6.66, 6.73), 7.42 (d, J = 8.4 Hz, 4 H), 7.50-7.60 (m, 8 H), 7.64-7.80 (m, 16 H); 13C NMR (100 MHz, CDCl3)  13.9, 14.0, 22.63, 22.66, 25.93, 25.95, 31.9, 32.0, 90.5, 109.7, 110.4, 113.7, 121.2, 121.7, 123.4, 123.8, 124.82, 124.88, 125.0, 125.4, 125.5, 126.5, 129.90, 129.94, 130.3, 131.3, 131.8, 131.9, 136.4, 136.5, 147.3, 148.1, 151.3, 152.0; IR (KBr)  3085, 3043, 2960, 2932, 2868, 2213, 1670, 1605, 1543, 1509, 1463, 1411, 1287, 1270, 1217, 1180, 1104, 1056, 1008, 932, 907, 839, 771, 730, 674 cm-1; MS (FAB) m/z (rel. intensity) 1123 [(M+H)+, 35], 1122 (M+, 30), 927 (5), 460 (15), 307 (100), 289 (50); HRMS calcd for C82H74O4: 1122.5587, found: 1122.5612.
